# Supplementary material for: Spatiotemporal relationships of coyotes and free-ranging domestic cats as indicators of conflict in Culver City, California
Source: PeerJ. 2022 Oct 7;10:e14169. doi: 10.7717/peerj.14169 (PMC9549883; doi:10.7717/peerj.14169)
Supplement: Supplemental Information 11 — This spreadsheet shows output values from the occupancy models for coyotes and rabbits, as well as calculations for model-averaged beta estimates, occupancy, and probability of detection. [file peerj-10-14169-s011.xlsx]

## Sheet: Coyote Occupancy Model Averages
Model Averaged Beta Estimates
Column1	model	npar	AICc	DeltaAICc	weight	Deviance	Greenspace		NumCat		CamHeight			Greenspace				NumCat				CamHeight
							B	se	B	se	B	se		B*wi	Var(B)	w*(var(b)+(B - mod-avgB)^2)		B*wi	Var(B)	w*(var(b)+(B - mod-avgB)^2)		B*wi	Var(B)	w*(var(b)+(B - mod-avgB)^2)
5	psi.GS_p.CamHeight	4	116.789	0	0.412831	106.123	2.16254	0.973136	N/A	N/A	0.480607	0.264364		0.892766	37.8798	15.6381		N/A	N/A	N/A		0.198409	2.79553	1.1756
6	psi.GS_p.Dot	3	117.062	0.273173	0.360125	109.562	2.20478	1.00439	N/A	N/A	N/A	N/A		0.793997	40.3516	14.5318		N/A	N/A	N/A		N/A	N/A	N/A
4	psi.GS.NumCat_p.Dot	4	119.527	2.73795	0.105011	108.861	2.50558	1.18038	-0.581477	0.696368	N/A	N/A		0.263113	55.7317	5.86346		-0.0610614	19.3971	2.05991		N/A	N/A	N/A
3	psi.GS.NumCat_p.CamHeight	5	119.717	2.92769	0.0955065	105.431	2.42549	1.09781	-0.552261	0.661539	0.48244	0.264801		0.23165	48.2075	4.60982		-0.0527445	17.5054	1.69027		0.0460762	2.80478	0.272933
1	psi.Dot_p.CamHeight	3	123.702	6.91239	0.0130246	116.202	N/A	N/A	N/A	N/A	0.498219	0.269136		N/A	N/A	N/A		N/A	N/A	N/A		0.00648912	2.89736	0.0385246
2	psi.Dot_p.Dot	2	124.522	7.73313	0.00864063	42.3098	N/A	N/A	N/A	N/A	N/A	N/A		N/A	N/A	N/A		N/A	N/A	N/A		N/A	N/A	N/A
7	psi.NumCat_p.CamHeight	4	126.852	10.0624	0.00269617	116.185	N/A	N/A	0.0616828	0.480021	0.497531	0.269114		N/A	N/A	N/A		0.000166307	9.21681	0.0249328		0.00134143	2.8969	0.00797267
8	psi.NumCat_p.Dot	3	127.291	10.5013	0.00216488	119.791	N/A	N/A	0.0785324	0.491544	N/A	N/A		N/A	N/A	N/A		0.000170014	9.66463	0.0210026		N/A	N/A	N/A
													mod-avg B	2.18153	mod-avg-VAR	40.6432	mod-avg B	-0.11347	mod-avg-VAR	3.79611	mod-avg B	0.252316	mod-avg-VAR	1.49503
		Covariate	Model-averaged Beta Estimate	Model-averaged SE	Model-averaged Lower CI*	Model-averaged Upper CI*							mod-avg se	1.00801	95%CI		mod-avg se	0.308063	95%CI		mod-avg se	0.193328	95%CI
	occupancy	Greenspace	2.18153	1.00801	0.165511	4.19754									Lower	0.165511			Lower	-0.729596			Lower	-0.13434
	probability of detection	CamHeight	0.252316	0.193328	-0.13434	0.638972									Upper	4.19754			Upper	0.502656			Upper	0.638972
	occupancy	NumCat	-0.11347	0.308063	-0.729596	0.502656
					*Note - if the CI overlaps zero, it's not significant
	Variable Importance Value (VIV) Calculations
		Covariate	VIV	Rank
		Greenspace	0.973474	1
		CamHeight	0.524058	2
		NumCat	0.205378	3
	Model-averaged Paramter Estimates from Model Output
		Estimate	SE	LCL	UCL
	Model-averaged psi	0.521121	0.154524	0.244332	0.785523
	Model-averaged p	0.464586	0.0642135	0.343473	0.590025

## Sheet: Rabbit Occupancy Model Average
Model Averaged Beta Estimates
Column1	model	npar	AICc	DeltaAICc	weight	Deviance	Greenspace		NumCat		CamHeight			Greenspace				NumCat				CamHeight
							B	se	B	se	B	se		B*wi	Var(B)	w*(var(b)+(B - mod-avgB)^2)		B*wi	Var(B)	w*(var(b)+(B - mod-avgB)^2)		B*wi	Var(B)	w*(var(b)+(B - mod-avgB)^2)
4	psi.GS_p.Dot	3	90.8466	0	0.618564	83.3466	2.04278	0.879833	N/A	N/A	N/A	N/A		1.26359	30.9642	19.1546		N/A	N/A	N/A		N/A	N/A	N/A
3	psi.GS_p.CamHeight	4	93.5467	2.70011	0.160348	82.88	2.04497	0.880596	N/A	N/A	-0.204749	0.301626		0.327907	31.018	4.97403		N/A	N/A	N/A		-0.0328311	3.63914	0.587565
6	psi.NumCat.GS_p.Dot	4	93.8028	2.95621	0.141075	83.1361	2.01736	0.895694	0.291577	0.659274	N/A	N/A		0.284599	32.0907	4.52726		0.0411344	17.3857	2.4527		N/A	N/A	N/A
5	psi.NumCat.GS_p.CamHeight	5	96.4333	5.58668	0.0378662	82.1475	3.23509	1.73086	6.20925	4.39538	-0.29865	0.301789		0.122501	119.835	4.59558		0.235121	772.775	30.5923		-0.0113087	3.64307	0.140364
2	psi.Dot_p.Dot	2	97.4229	6.5763	0.0230865	33.9592	N/A	N/A	N/A	N/A	N/A	N/A		N/A	N/A	N/A		N/A	N/A	N/A		N/A	N/A	N/A
8	psi.NumCat_p.Dot	3	99.2134	8.36686	0.00943071	91.7134	N/A	N/A	0.489293	0.519909	N/A	N/A		N/A	N/A	N/A		0.00461438	10.8122	0.102372		N/A	N/A	N/A
1	psi.Dot_p.CamHeight	3	99.7609	8.91435	0.00717231	92.2609	N/A	N/A	N/A	N/A	-0.203142	0.302497		N/A	N/A	N/A		N/A	N/A	N/A		-0.001457	3.66018	0.0264288
7	psi.NumCat_p.CamHeight	4	101.904	11.0573	0.00245657	91.2372	N/A	N/A	0.499052	0.529689	-0.207408	0.302232		N/A	N/A	N/A		0.00122596	11.2228	0.0276853		-0.000509513	3.65376	0.00903963
													mod-avg B	1.9986	mod-avg-VAR	33.2514	mod-avg B	0.282095	mod-avg-VAR	33.1751	mod-avg B	-0.0461063	mod-avg-VAR	0.763398
													mod-avg se	0.911749	95%CI		mod-avg se	0.910702	95%CI		mod-avg se	0.138148	95%CI
		Covariate	Model-averaged Beta Estimate	Model-averaged SE	Model-averaged Lower CI*	Model-averaged Upper CI*									Lower	0.175099			Lower	-1.53931			Lower	-0.322403
	occupancy	Greenspace	1.9986	0.911749	0.175099	3.82209									Upper	3.82209			Upper	2.1035			Upper	0.23019
	probability of detection	CamHeight	-0.0461063	0.138148	-0.322403	0.23019
	occupancy	NumCat	0.282095	0.910702	-1.53931	2.1035
					*Note - if the CI overlaps zero, it's not significant
	Variable Importance Value (VIV) Calculations
		Covariate	VIV	Rank
		Greenspace	0.957854	1
		CamHeight	0.207843	2
		NumCat	0.190829	3
	Model-averaged Paramter Estimates from Model Output
		Estimate	SE	LCL	UCL
	Model-averaged psi	0.275394	0.151539	0.0790145	0.627373
	Model-averaged p	0.565808	0.0726934	0.42185	0.699458
